# Supplementary material for: Rapid generation of purified human RPE from pluripotent stem cells using 2D cultures and lipoprotein uptake-based sorting
Source: PubMed Central journal article supplement (PMC6998340; doi:10.1186/s13287-020-1568-3), 2020-02-03
Supplement: 13287_2020_1568_MOESM1_ESM.pdf [file 13287_2020_1568_MOESM1_ESM.pdf]

Table S1

|               | Forward Sequence        | Reverse Sequence         |
|---------------|-------------------------|--------------------------|
| <b>CD136</b>  | GTCAATGGGACTGAGTGTCTGC  | TCTCTGACTGGAAGGTCCAGG    |
| <b>CD14</b>   | CTGGAACAGGTGCCTAAAGGAC  | GTCCAGTGCAGGTTATCCACC    |
| <b>CD207</b>  | TAATCTGCCTGACGCTGGTCT   | GGTGCTGATGTTGTCCACACGA   |
| <b>CD209</b>  | GCAGTCTTCCAGAAGTAACCGC  | GCTCTCCTCTGTTCCAATACTGC  |
| <b>CD36</b>   | CAGGTCAACCTATTGGTCAAGCC | GCCTTCTCATCACCAATGGTCC   |
| <b>CXCL16</b> | CCTATGTGCTGTGCAAGAGGAG  | CTGGGCAACATAGAGTCCGTCT   |
| <b>GAPDH</b>  | GTCTCCTCTGACTTCAACAGCG  | ACCACCCTGTTGCTGTAGCCAA   |
| <b>GPI</b>    | CTGGTAGACGGCAAGGATGTGA  | TCCGTGATGGTCTTGCCTGTGT   |
| <b>HMBS</b>   | ACGGCTCAGATAGCATACAAGAG | GTTACGAGCAGTGATGCCTACC   |
| <b>LDLR</b>   | GAATCTACTGGTCTGACCTGTCC | GGTCCAGTAGATGTTGCTGTGG   |
| <b>LHX2</b>   | ACGCCAAGGACTTGAAGCAGCT  | TTTCTGCCGTAAGAGGTTGCG    |
| <b>LRP1</b>   | CAACGGCATCTCAGTGGACTAC  | TGTTGCTGGACAGAACCACCTC   |
| <b>LRP1B</b>  | ATCGACTACCGTGCAGAGAAGC  | CAGCCAAACTGAGGAAAGTCCC   |
| <b>LRP2</b>   | GTCTAACCGCACTGTGATAGCC  | CGGAAGTTTCTCCAATGTGG     |
| <b>LRP4</b>   | GTGTGGCAGAACCTTGACAGTC  | ACCGCTCTAACTTGGCATTCTCC  |
| <b>LRP8</b>   | GAAGCGGAACTATTCACGCCTC  | ATGAGGACCTCCTGCTCTTTCCG  |
| <b>LY75</b>   | GCAAGCGATACCTGTCACTCCT  | ATAGGCAGTCCAGCGCAAACCA   |
| <b>MARCO</b>  | GGACAATTTGCGATGACGAGTGG | CCGACACTGAACATTATCCAGCC  |
| <b>MEGF10</b> | TGACTGCTTGCCTGGCTTCACA  | GTTACAGGTTCCGTTGTTGGTGC  |
| <b>MRC1</b>   | AGCCAACACCAGCTCCTCAAGA  | CAAAACGCTCGCGCATTGTCCA   |
| <b>MSR1</b>   | TGCACAAGGCAGCTCACTTTGG  | GTGCAAGTGACTCCAGCATCTTC  |
| <b>OLR1</b>   | GAAACCCTTGCTCGGAAGCTGA  | CAGATCCAGTCTTGCGGACAAG   |
| <b>PAX6</b>   | CTGAGGAATCAGAGAAGACAGGC | ATGGAGCCAGATGTGAAGGAGG   |
| <b>RAGE</b>   | CACCTTCTCCTGTAGCTTCAGC  | AGGAGCTACTGCTCCACCTTCT   |
| <b>RAX</b>    | GCAAGGTCAACCTACCAGAGGT  | GCAGCTTCATGGAGGACACTTC   |
| <b>SCARA3</b> | CTCCGAAGACATCTCCTTGACC  | CCAGCTTCATGGCAGAAAGAGC   |
| <b>SCARA4</b> | AGACTCCAAGCATGGTCAGCTC  | CCTTTCTGTCCCTTGTGGCCAG   |
| <b>SCARA5</b> | GCTGAACCTGTGTGAGGATGGT  | TCAGGAAGACCAGCAGGTAGAG   |
| <b>SCARB1</b> | GGTCCAGAACATCAGCAGGATC  | GCCACATTTGCCAGAAGTTCC    |
| <b>SCARB2</b> | GCCAATACGTGACACAATGCCG  | CTCATCTGCTTGGTAAAAGTGTGG |
| <b>SCARD1</b> | CGAGCATCATTCTTTCACCAGCT | ATGAGAGGCAGCAAGATGGACC   |
| <b>SCARF1</b> | AGTACCGTGTCCAGGATGAAG   | GGCTCGATGAAGCTGTGGTTGA   |
| <b>SCARF2</b> | CTTTCGCTTGGGAGGAAGAAGG  | GTGTGTTATCCAGGTCGTGGTG   |
| <b>SIX3</b>   | CTCCACACAAGTAGGCAACTG   | TCTGCCGAGCCGTGCGTGGG     |
| <b>SSC4D</b>  | TCACTACGAGGATGTGGCTGTC  | TTCCATTCGGCAGTGTCTAGG    |
| <b>SSC5D</b>  | TGTGACTGCCAGTGTCTGGAG   | GGAGTGTTCGTGGTTGGCATC    |
| <b>STAB1</b>  | GAACCATGTGCCACTGGAAGGC  | AGCGGAATCTCCTGGTGCAGTT   |
| <b>STAB2</b>  | ACTGGCTCCTTACCAAACCTGC  | GAGCAAACACTGTGTAGGCATCG  |
| <b>VLDLR</b>  | CAAGGATGGCAGTGATGAGGTC  | CTCGGATACCATTACTGCCTG    |
